# Supplementary material for: Persistence of exon 2 skipping and dystrophin expression at 18 months after U7snRNA-mediated therapy in the Dup2 mouse model
Source: PubMed Central journal article supplement — Mol Ther Methods Clin Dev. 2023 Oct 26;31:101144. doi: 10.1016/j.omtm.2023.101144 (PMC10679948; doi:10.1016/j.omtm.2023.101144), 2023-10-26
Supplement: mmc1.pdf [file mmc1.pdf]

**OMTM, Volume 31**

**Supplemental information**

**Persistence of exon 2 skipping and dystrophin  
expression at 18 months after U7snRNA-  
mediated therapy in the Dup2 mouse model**

**Liubov V. Gushchina, Adrienne J. Bradley, Tatyana A. Vetter, Jacob W. Lay, Natalie L. Rohan, Emma C. Frair, Nicolas Wein, and Kevin M. Flanigan**

## Supplemental Tables

**Table S1.** Animals body weight.

| Groups       | Body weight at necropsy, g |                  |
|--------------|----------------------------|------------------|
|              | n                          | Mean $\pm$ SEM   |
| Dup2-Diluent | 9                          | 36.40 $\pm$ 1.17 |
| Dup2-ACCA    | 11                         | 39.66 $\pm$ 1.12 |
| C57Bl/6      | 11                         | 39.74 $\pm$ 1.38 |

**Table S2.** qPCR quantification of scAAV9.U7.ACCA vector genome biodistribution in WT control and Dup2 treated animals.

| Muscles | Groups       | Vector Copies /Diploid Genome |                    |
|---------|--------------|-------------------------------|--------------------|
|         |              | n                             | Mean $\pm$ SEM     |
| TA      | Dup2-Diluent | 9                             | 0.00065            |
|         | Dup2-ACCA    | 11                            | 0.38 $\pm$ 0.10    |
|         | C57Bl/6      | 11                            | 0.002 $\pm$ 0.0004 |
| Heart   | Dup2-Diluent | 9                             | 0.0006             |
|         | Dup2-ACCA    | 10                            | 0.75 $\pm$ 0.18    |
|         | C57Bl/6      | 11                            | 0.00073            |
| Dia     | Dup2-Diluent | 9                             | 0.003 $\pm$ 0.001  |
|         | Dup2-ACCA    | 11                            | 0.65 $\pm$ 0.40    |
|         | C57Bl/6      | 10                            | Undermined         |
| Liver   | Dup2-Diluent | 9                             | Undermined         |
|         | Dup2-ACCA    | 11                            | 85.47 $\pm$ 27.91  |
|         | C57Bl/6      | 11                            | Undermined         |
| Brain   | Dup2-Diluent | 7                             | Undermined         |
|         | Dup2-ACCA    | 11                            | 0.39 $\pm$ 0.09    |
|         | C57Bl/6      | 11                            | Undermined         |

**Table S3.** RT-PCR quantification analysis of exon 2 skipping in WT control and Dup2 treated mice.

| Muscles | Groups       | n      | % Dup2 transcript | % WT transcript | % Del2 transcript | % WT + Del2 (therapeutic transcript) |
|---------|--------------|--------|-------------------|-----------------|-------------------|--------------------------------------|
|         |              |        | Mean ± SEM        | Mean ± SEM      | Mean ± SEM        | Mean ± SEM                           |
| TA      | Dup2-Diluent | n = 9  | 96.81 ± 1.03      | 3.19 ± 1.03     | 0.0 ± 0.0         | 3.19 ± 1.03                          |
|         | Dup2-ACCA    | n = 10 | 54.02 ± 6.7       | 23.11 ± 2.15    | 22.87 ± 5.05      | 45.98 ± 6.7                          |
|         | C57Bl/6      | n = 10 | 0.0 ± 0.0         | 100 ± 0.0       | 0.0 ± 0.0         | 100 ± 0.0                            |
| Heart   | Dup2-Diluent | n = 9  | 99.57 ± 0.11      | 0.43 ± 0.11     | 0.0 ± 0.0         | 0.43 ± 0.11                          |
|         | Dup2-ACCA    | n = 10 | 26.56 ± 5.17      | 36.80 ± 1.76    | 36.64 ± 4.9       | 73.44 ± 5.17                         |
|         | C57Bl/6      | n = 11 | 0.0 ± 0.0         | 100 ± 0.0       | 0.0 ± 0.0         | 100 ± 0.0                            |
| Dia     | Dup2-Diluent | n = 9  | 98.78 ± 0.39      | 1.22 ± 0.39     | 0 ± 0.0           | 1.22 ± 0.39                          |
|         | Dup2-ACCA    | n = 11 | 68.18 ± 4.71      | 20.13 ± 2.5     | 11.69 ± 2.44      | 31.82 ± 4.71                         |
|         | C57Bl/6      | n = 10 | 0.0 ± 0.0         | 100 ± 0.0       | 0.0 ± 0.0         | 100 ± 0.0                            |

**Table S4.** Percentage of positive dystrophin fibers (PPDF) and dystrophin intensity in WT control and Dup2 treated mice.

| Muscles | Groups       | PDPF (%) |              | Dystrophin Intensity |              |
|---------|--------------|----------|--------------|----------------------|--------------|
|         |              | n        | Mean ± SEM   | n                    | Mean ± SEM   |
| TA      | Dup2-Diluent | 9        | 12.47 ± 1.67 | 9                    | 6.72 ± 0.3   |
|         | Dup2-ACCA    | 11       | 51.87 ± 7.15 | 11                   | 29.59 ± 4.95 |
|         | C57Bl/6      | 9        | 99.45 ± 0.16 | 9                    | 102.7 ± 2.81 |
| Heart   | Dup2-Diluent | 8        | 1.18 ± 0.19  | 8                    | 3.7 ± 0.34   |
|         | Dup2-ACCA    | 10       | 96.50 ± 0.68 | 10                   | 43.13 ± 1.7  |
|         | C57Bl/6      | 10       | 99.90 ± 0.04 | 10                   | 100.8 ± 3.91 |
| Dia     | Dup2-Diluent | 7        | 4.03 ± 1.21  | 7                    | 3.94 ± 0.42  |
|         | Dup2-ACCA    | 11       | 47.45 ± 2.87 | 11                   | 25.66 ± 1.96 |
|         | C57Bl/6      | 7        | 96.33 ± 0.91 | 7                    | 98.44 ± 1.99 |

**Table S5.** Western blot dystrophin quantification analysis in WT control and Dup2 mice treated with diluent or with scAAV9.U7.ACCA vector.

| Muscles | Groups       | % Dystrophin expression |                  |
|---------|--------------|-------------------------|------------------|
|         |              | n                       | Mean $\pm$ SEM   |
| TA      | Dup2-Diluent | 9                       | 13.40 $\pm$ 1.49 |
|         | Dup2-ACCA    | 11                      | 41.92 $\pm$ 8.93 |
| Heart   | Dup2-Diluent | 7                       | 3.01 $\pm$ 0.31  |
|         | Dup2-ACCA    | 10                      | 65.36 $\pm$ 5.12 |
| Dia     | Dup2-Diluent | 9                       | 5.01 $\pm$ 0.43  |
|         | Dup2-ACCA    | 9                       | 17.68 $\pm$ 1.89 |

**Table S6.** Specific force and eccentric contraction quantification analysis in WT control and Dup2 treated mice.

| Groups       | Tibialis anterior                  |                   |                                                |                  |                                                | Diaphragm                          |                   |
|--------------|------------------------------------|-------------------|------------------------------------------------|------------------|------------------------------------------------|------------------------------------|-------------------|
|              | Specific force, mN/mm <sup>2</sup> |                   | Eccentric contractions (ECC), % Force decrease |                  | ECC area under the curve (AUC), Absolute Units | Specific force, mN/mm <sup>2</sup> |                   |
|              | n*                                 | Mean $\pm$ SEM    | n*                                             | Mean $\pm$ SEM** | Mean $\pm$ SEM                                 | n                                  | Mean $\pm$ SEM    |
| Dup2-Diluent | 12                                 | 147.7 $\pm$ 4.23  | 12                                             | 25.75 $\pm$ 2.2  | 429.5 $\pm$ 22.61                              | 9                                  | 123.0 $\pm$ 9.25  |
| Dup2-ACCA    | 14                                 | 168.1 $\pm$ 10.05 | 14                                             | 53.24 $\pm$ 5.0  | 619 $\pm$ 40.75                                | 11                                 | 181.0 $\pm$ 13.33 |
| C57Bl/6      | 15                                 | 239.8 $\pm$ 10.78 | 9                                              | 87.46 $\pm$ 2.8  | 848.6 $\pm$ 17.76                              | 11                                 | 246.9 $\pm$ 18.99 |

\*n corresponds the number of legs that were used for independent TA muscle analysis during tetanic and eccentric contractions.

\*\*Force retained is represented as percentage of 1<sup>st</sup> contraction after 10 cycles of contractions.

**Table S7.** Histopathological and Morphometric analysis in WT control and Dup2 treated mice.

| Muscles | Groups       | CNF (%) |                  | Fiber size ( $\mu$ m) |                  |
|---------|--------------|---------|------------------|-----------------------|------------------|
|         |              | n       | Mean $\pm$ SEM   | n                     | Mean $\pm$ SEM   |
| TA      | Dup2-Diluent | 9       | 58.83 $\pm$ 2.24 | 9                     | 43.72 $\pm$ 0.74 |
|         | Dup2-ACCA    | 11      | 65.83 $\pm$ 1.79 | 11                    | 47.71 $\pm$ 0.94 |
|         | C57Bl/6      | 9       | 3.12 $\pm$ 0.45  | 9                     | 48.16 $\pm$ 1.26 |
| Dia     | Dup2-Diluent | 7       | 27.76 $\pm$ 2.64 | 7                     | 25.50 $\pm$ 0.46 |
|         | Dup2-ACCA    | 11      | 34.79 $\pm$ 1.78 | 11                    | 28.60 $\pm$ 0.32 |
|         | C57Bl/6      | 7       | 12.38 $\pm$ 3.45 | 7                     | 27.93 $\pm$ 0.88 |

Supplemental Figures

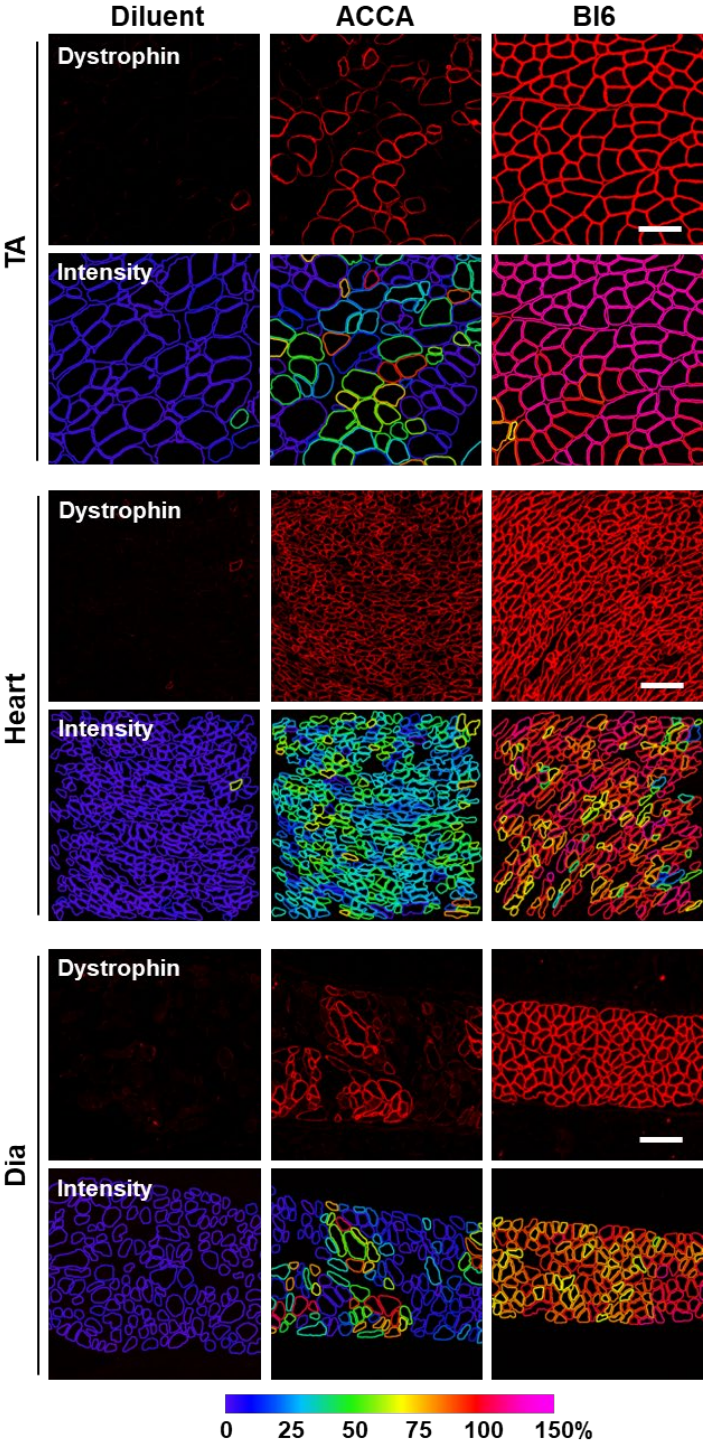

**Figure S1. Dystrophin expression in skeletal muscles and heart 18 months post scAAV9.U7.ACCA administration.** Representative immunofluorescent images show selected regions of interest (ROI) of left TA (TA), heart and diaphragm (Dia) sections with dystrophin in red displaying localization and intensity of dystrophin signal in Bl6, Dup2-diluent (Diluent) or Dup2-ACCA (ACCA) mice. Color-coded heatmaps of each tissue demonstrate the normalized dystrophin intensity (intensity) for each muscle fiber. Color key in bottom shows intensity heatmaps. Scale bars = 100  $\mu$ m.

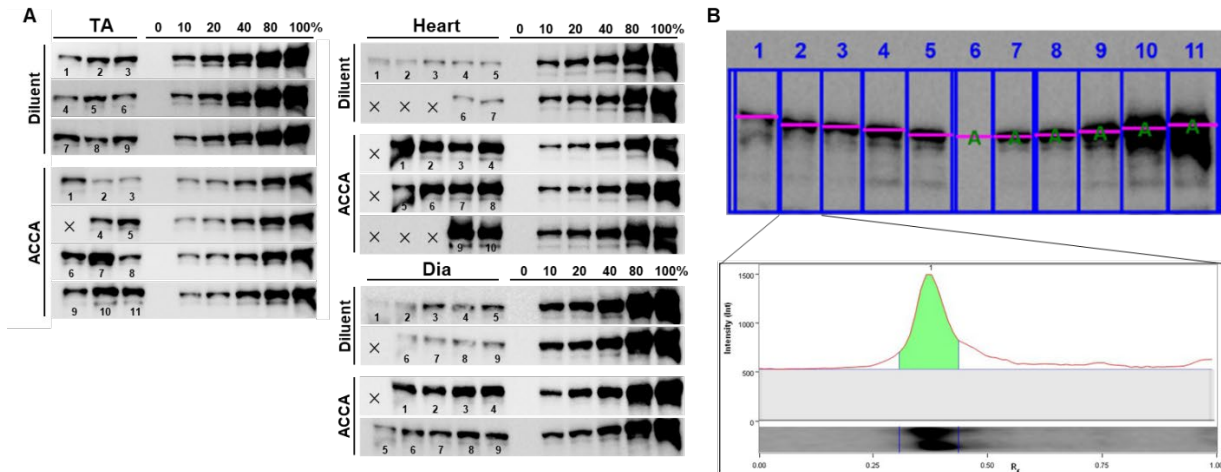

**Figure S2. Long-term restoration of full-length dystrophin in Dup2 mice following systemically administrated svAAV9.U7.ACCA 18 months post injection.** (A) Western blot images of left tibialis anterior (TA) muscles, heart and diaphragm (Dia) showing dystrophin expression in Dup2 mice treated with diluent (Diluent) or scAAV9.U7.ACCA (ACCA) vector 18 months post injection. All tested samples were numbered 1 to 11, and the right six lanes of every blot contain a 6-point standard curve of pooled Bl6 ( $n = 7-8$ ) lysate diluted in Dup2Del18-41 dystrophin-null muscle lysate, ranging from 0% to 100%. (B) Representative WB image of the Dia tissue from the Dup2-ACCA group (top panel) showing dystrophin bands quantification

analysis (bottom panel) using the Image Lab software. The pink lanes represent dystrophin bands that were used to make a 5-point standard curve containing 0%-80% dystrophin (lanes 6-10, A-absolute value) and then to quantify the percentage of dystrophin in the study samples (lanes 1-5). The 6<sup>th</sup>-point of the standard curve, containing 100% dystrophin, was excluded from the analysis to maintain its linearity of  $R^2 \geq 0.9$ . The bottom panel represents the area under the curve of lane 2. For dystrophin quantification analysis, the background in all samples was subtracted with a disk size of 50. <https://www.bio-rad.com/en-us/product/image-lab-software?ID=KRE6P5E8Z>



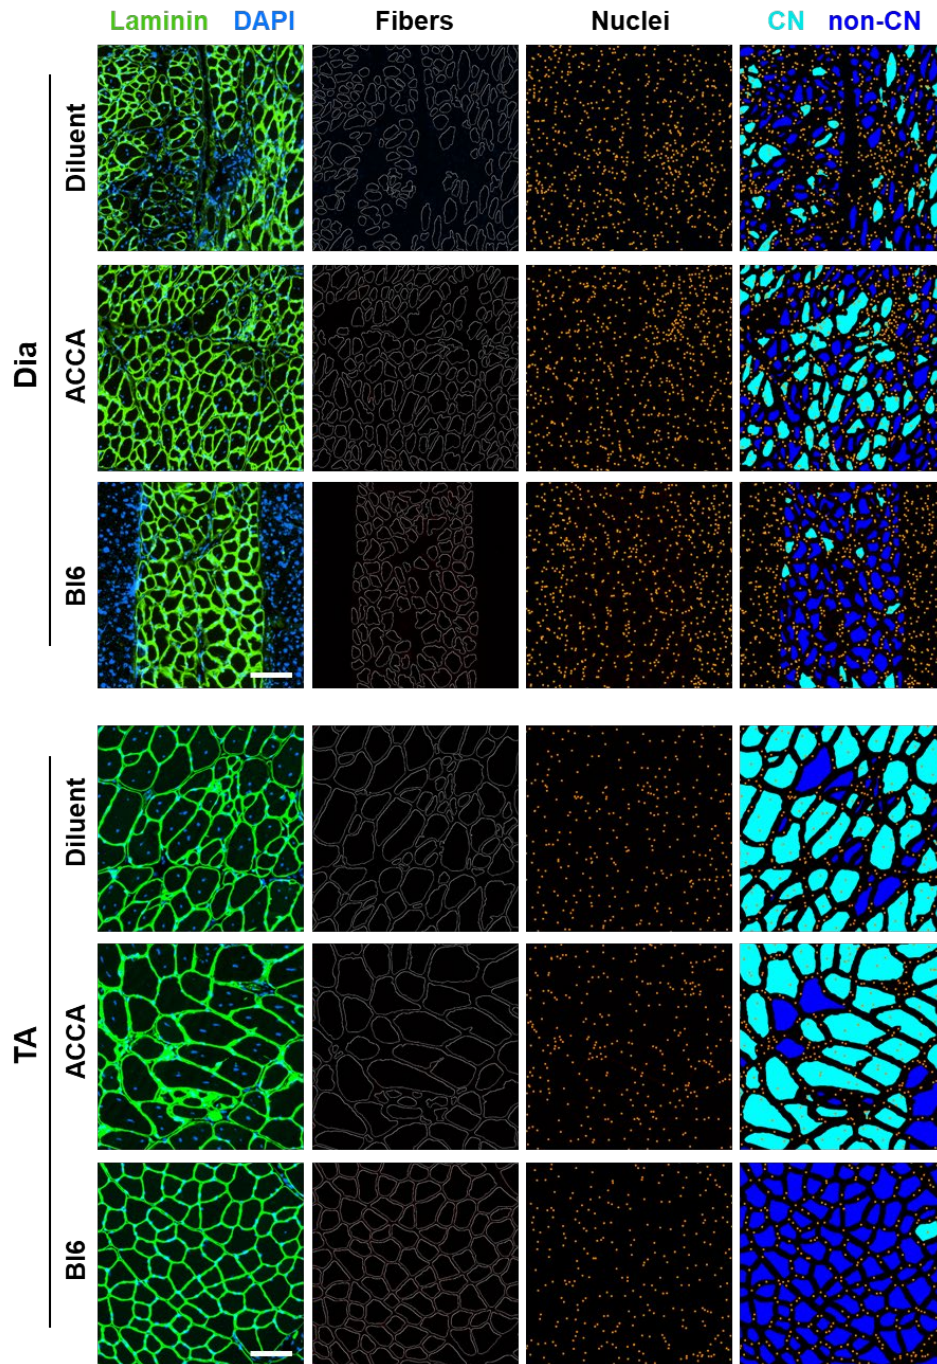

**Figure S3.** Representative immunofluorescent images show selected regions of interest (ROI) of left side of TA and Dia sections with laminin in green and DAPI in blue that were used for central nucleation (CN) analysis in Bl6, Dup2-diluent (Diluent) or Dup2-ACCA (ACCA) mice. Light teal and dark blue represent CN and non-CN fibers. Scale bar = 100  $\mu$ m.
